# Supplementary material for: Combination of Immune-Related Network and Subtype-Specific Analysis Define a Three- Gene Panel for Predicting Prognosis of Triple-Negative Breast Cancer
Source: Research Square preprint supplement (doi:10.21203/rs.3.rs-1627964/v1), 2022-05-09
Supplement: Supplementary file 1 [file cda2f188ace2617a57e16680.docx]

TABLE S1 The results of Cox regression analysis for DEGs between different IRGs subtypes

| id | HR | HR.95L | HR.95H | pvalue |
| --- | --- | --- | --- | --- |
| GBP4 | 0.826445146 | 0.739094681 | 0.924119191 | 0.000824152 |
| GBP5 | 0.83977668 | 0.757725948 | 0.930712318 | 0.000872225 |
| CCL5 | 0.855939412 | 0.775251657 | 0.945025104 | 0.002075143 |
| IRF1 | 0.798617935 | 0.694273376 | 0.918644771 | 0.001645155 |
| CD2 | 0.846573567 | 0.757063487 | 0.946666715 | 0.003486463 |
| STAT1 | 0.869857153 | 0.769429363 | 0.983393023 | 0.025913278 |
| ICOS | 0.758565913 | 0.640874867 | 0.897869888 | 0.001316524 |
| APOBEC3G | 0.799921208 | 0.686160572 | 0.932542563 | 0.004340492 |
| CD3D | 0.836624816 | 0.748604511 | 0.934994475 | 0.001660669 |
| IDO1 | 0.845236506 | 0.768624095 | 0.929485239 | 0.000523611 |
| TAP1 | 0.837694746 | 0.743861071 | 0.943364985 | 0.00347975 |
| CXCR3 | 0.811014689 | 0.692347456 | 0.950021294 | 0.009454309 |
| GZMB | 0.842571049 | 0.759994762 | 0.93411956 | 0.001134124 |
| NKG7 | 0.895671053 | 0.803607464 | 0.998281713 | 0.046476386 |
| CTLA4 | 0.733047684 | 0.615367154 | 0.873233003 | 0.000504792 |
| PSMB9 | 0.8491472 | 0.747369538 | 0.964785065 | 0.012062424 |
| HLA-F | 0.800900787 | 0.698084173 | 0.918860641 | 0.001539812 |
| CXCL9 | 0.877542166 | 0.814707322 | 0.945223189 | 0.00056877 |
| CD8A | 0.830216289 | 0.733185987 | 0.940087643 | 0.003343558 |
| CD247 | 0.809391756 | 0.708594677 | 0.924527145 | 0.001830797 |
| CD38 | 0.828476693 | 0.725892495 | 0.945558241 | 0.005270977 |
| CXCR6 | 0.723309482 | 0.594215414 | 0.880449404 | 0.001240878 |
| PSMB10 | 0.769976227 | 0.637455846 | 0.930046204 | 0.006677393 |
| GBP1 | 0.816051092 | 0.723157216 | 0.920877743 | 0.000977964 |
| AIM2 | 0.837357619 | 0.728101372 | 0.96300846 | 0.01283298 |
| IL18BP | 0.832042422 | 0.706388364 | 0.980048125 | 0.02771945 |
| GZMA | 0.844759191 | 0.750531825 | 0.950816563 | 0.005177804 |
| UBD | 0.880788466 | 0.818400045 | 0.947932893 | 0.000707898 |
| HLA-B | 0.820318009 | 0.714936483 | 0.941232754 | 0.004753469 |
| CYTIP | 0.804093142 | 0.667399641 | 0.96878353 | 0.021815529 |
| CD7 | 0.821873132 | 0.708017447 | 0.954037853 | 0.009925792 |
| HLA-E | 0.830964711 | 0.696811107 | 0.990946247 | 0.039283464 |
| CXCL13 | 0.849843133 | 0.774866107 | 0.932075031 | 0.000555088 |
| CD48 | 0.842756097 | 0.739077671 | 0.960978618 | 0.010642138 |
| IL18RAP | 0.605363605 | 0.464897734 | 0.78827034 | 0.0001944 |
| CD3G | 0.790930055 | 0.659502203 | 0.948549298 | 0.011417185 |
| PRF1 | 0.824478436 | 0.70625494 | 0.962491946 | 0.014522288 |
| ITK | 0.800498826 | 0.678253309 | 0.944777359 | 0.008492648 |
| LTA | 0.801350358 | 0.659829147 | 0.973225264 | 0.025502412 |
| CORO1A | 0.798557407 | 0.684887553 | 0.931092892 | 0.004088177 |
| CXCL10 | 0.917181314 | 0.847027544 | 0.993145463 | 0.033222692 |
| SASH3 | 0.836190153 | 0.71185204 | 0.982246214 | 0.029402043 |
| GIMAP4 | 0.84468308 | 0.726255639 | 0.982421984 | 0.028519645 |
| ZBED2 | 0.71634754 | 0.575698528 | 0.891358536 | 0.002778681 |
| IFNG | 0.780000579 | 0.648846677 | 0.937665129 | 0.008164624 |
| CST7 | 0.835715047 | 0.715456924 | 0.976186848 | 0.023573852 |
| RAC2 | 0.847508662 | 0.74357375 | 0.965971339 | 0.013189524 |
| MAP4K1 | 0.855951281 | 0.734071586 | 0.998066959 | 0.047183125 |
| HCST | 0.82911561 | 0.722489254 | 0.951478089 | 0.007627168 |
| PDCD1 | 0.805726218 | 0.661078838 | 0.982023173 | 0.032383126 |
| GNLY | 0.837996578 | 0.75060695 | 0.935560567 | 0.001658716 |
| ARHGAP9 | 0.821661222 | 0.700640704 | 0.963585415 | 0.015680808 |
| SLAMF1 | 0.776381632 | 0.636059302 | 0.947660755 | 0.01282829 |
| IL2RG | 0.789870285 | 0.656854676 | 0.949822068 | 0.012171691 |
| CD6 | 0.811580161 | 0.698868826 | 0.94246922 | 0.006206621 |
| PYHIN1 | 0.774349442 | 0.635905206 | 0.942934657 | 0.010939313 |
| CD53 | 0.836257445 | 0.709085208 | 0.986237629 | 0.033618692 |
| PLEK | 0.84178936 | 0.737180892 | 0.961242126 | 0.010964837 |
| SH2D1A | 0.758776042 | 0.634958029 | 0.906738801 | 0.002388984 |
| LAMP3 | 0.839905076 | 0.748042642 | 0.94304856 | 0.00315538 |
| CD27 | 0.825652793 | 0.713909073 | 0.954887057 | 0.009818931 |
| HLA-DMA | 0.830247696 | 0.719828873 | 0.957604318 | 0.01062115 |
| HLA-DMB | 0.830632207 | 0.722643368 | 0.954758451 | 0.009014597 |
| TBC1D10C | 0.810956743 | 0.697181094 | 0.943299876 | 0.006592353 |
| RASAL3 | 0.839282458 | 0.719467946 | 0.979049934 | 0.02578949 |
| PSTPIP1 | 0.80790319 | 0.653080298 | 0.999429268 | 0.049388368 |
| ARHGAP25 | 0.828309731 | 0.69375355 | 0.988963602 | 0.037281803 |
| ZNF683 | 0.815035462 | 0.695944188 | 0.954505858 | 0.011158675 |
| NLRC5 | 0.745806182 | 0.613910377 | 0.906039191 | 0.003140035 |
| BTN3A1 | 0.755750754 | 0.621730266 | 0.918660765 | 0.00492673 |
| ACAP1 | 0.817536862 | 0.687299651 | 0.972452872 | 0.022877543 |
| GZMK | 0.870754081 | 0.784646488 | 0.966311174 | 0.009187037 |
| PRKCB | 0.814846315 | 0.707605194 | 0.938340367 | 0.004456304 |
| HCLS1 | 0.817673893 | 0.706015876 | 0.94699088 | 0.007209204 |
| STAT4 | 0.748664266 | 0.623681301 | 0.898693264 | 0.00189546 |
| PSME2 | 0.7409021 | 0.605088627 | 0.907199205 | 0.003700236 |
| HLA-DOB | 0.784192549 | 0.673837099 | 0.912621099 | 0.001680499 |
| SEMA4D | 0.766928207 | 0.624937438 | 0.941180412 | 0.011076529 |
| IL10RA | 0.831649855 | 0.706978893 | 0.978305701 | 0.026104657 |
| TNFRSF1B | 0.781459707 | 0.64229019 | 0.95078406 | 0.013727338 |
| SLAMF7 | 0.801879498 | 0.668832621 | 0.961392596 | 0.017064647 |
| BTN3A3 | 0.733500494 | 0.602857554 | 0.892454564 | 0.001955656 |
| FGL2 | 0.865348898 | 0.759523293 | 0.985919356 | 0.029777493 |
| CTSW | 0.818501692 | 0.691340944 | 0.969051559 | 0.020077424 |
| GPSM3 | 0.798230112 | 0.664460035 | 0.958930978 | 0.01603691 |
| GZMH | 0.83360377 | 0.71663248 | 0.969667528 | 0.018311661 |
| CYBB | 0.868197321 | 0.760186817 | 0.991554407 | 0.037061294 |
| SLA | 0.799452427 | 0.652080354 | 0.980131021 | 0.031318027 |
| ZAP70 | 0.821307826 | 0.683489016 | 0.986916438 | 0.035685911 |
| ARHGAP30 | 0.772577925 | 0.639148636 | 0.933862043 | 0.007645664 |
| PIM2 | 0.838810551 | 0.732245188 | 0.960884622 | 0.011227128 |
| IL7R | 0.855881478 | 0.761346398 | 0.962154819 | 0.009160433 |
| CCR7 | 0.860718451 | 0.756130754 | 0.979772676 | 0.023261433 |
| AKNA | 0.815411783 | 0.678064825 | 0.980579365 | 0.030131514 |
| FASLG | 0.78741369 | 0.62479804 | 0.992353177 | 0.042867089 |
| GIMAP5 | 0.831330044 | 0.69350162 | 0.996550868 | 0.045790305 |
| P2RY8 | 0.827227127 | 0.700020659 | 0.977549322 | 0.025980464 |
| S1PR4 | 0.790165307 | 0.638107434 | 0.978457826 | 0.030798576 |
| EVI2B | 0.860907208 | 0.749961322 | 0.988265927 | 0.033366389 |
| SAMD3 | 0.720804952 | 0.555714211 | 0.934940601 | 0.013630323 |
| UBASH3A | 0.7361444 | 0.569106384 | 0.952209628 | 0.019653156 |
| RTP4 | 0.839356696 | 0.730480911 | 0.964460059 | 0.013493841 |
| IRF8 | 0.83070884 | 0.72947177 | 0.945995727 | 0.005154066 |
| GIMAP7 | 0.866232807 | 0.753479159 | 0.995859364 | 0.043562079 |
| TNFAIP3 | 0.821776344 | 0.686408918 | 0.983839721 | 0.032567849 |
| PATL2 | 0.719761764 | 0.538073696 | 0.962799335 | 0.026734956 |
| TNFSF13B | 0.848778092 | 0.747910231 | 0.963249624 | 0.011084454 |
| STX11 | 0.78590372 | 0.651448613 | 0.948109559 | 0.011850712 |
| HLA-DRA | 0.841891908 | 0.749449318 | 0.945737046 | 0.003730661 |
| SELL | 0.846843909 | 0.746196948 | 0.961066121 | 0.01002042 |
| GBP2 | 0.819034855 | 0.71239071 | 0.941643517 | 0.005035344 |
| HLA-DQA1 | 0.869346296 | 0.784589315 | 0.963259337 | 0.007469156 |
| APOBEC3F | 0.779505145 | 0.637254199 | 0.953510031 | 0.01539139 |
| CD69 | 0.815312609 | 0.700156192 | 0.949409086 | 0.008583564 |
| P2RY10 | 0.804765295 | 0.669616057 | 0.967191832 | 0.02058042 |
| LTB | 0.853589388 | 0.769462907 | 0.946913538 | 0.002786507 |
| LY9 | 0.774045948 | 0.607904297 | 0.985594496 | 0.037739683 |
| GMFG | 0.804452821 | 0.676503574 | 0.956601511 | 0.013817485 |
| LCP2 | 0.743774794 | 0.579986189 | 0.953817445 | 0.01967217 |
| HLA-DOA | 0.843121997 | 0.739621905 | 0.961105529 | 0.010660669 |
| PSMB8 | 0.841086459 | 0.72320464 | 0.978182925 | 0.024686216 |
| TRAT1 | 0.735227336 | 0.589276173 | 0.917327494 | 0.006444606 |
| HLA-DPA1 | 0.840036578 | 0.747207067 | 0.944398793 | 0.003529197 |
| LAT2 | 0.791764521 | 0.637700688 | 0.983049054 | 0.034446086 |
| PSME1 | 0.774230118 | 0.627040744 | 0.955970216 | 0.017382617 |
| DOCK10 | 0.800382482 | 0.668643554 | 0.958077161 | 0.015236348 |
| TRAF1 | 0.735484633 | 0.577188509 | 0.937194067 | 0.012972457 |
| SAMSN1 | 0.825311759 | 0.683416018 | 0.996668913 | 0.046083418 |
| ARHGAP15 | 0.82160851 | 0.689413323 | 0.979152159 | 0.028138161 |
| BTLA | 0.728873738 | 0.565524823 | 0.93940514 | 0.014574382 |
| PTPRC | 0.816449706 | 0.688310886 | 0.968443382 | 0.019907778 |
| LPXN | 0.80864644 | 0.677407449 | 0.965311299 | 0.018737898 |
| IGSF6 | 0.844156167 | 0.714846037 | 0.9968575 | 0.045818066 |
| HLA-G | 0.820699656 | 0.705118216 | 0.955226954 | 0.010728375 |
| IL15RA | 0.693617039 | 0.551946866 | 0.871650199 | 0.001698745 |
| DOCK2 | 0.849392021 | 0.728321339 | 0.990588586 | 0.037481163 |
| IL32 | 0.855495229 | 0.747979166 | 0.978465873 | 0.022747334 |
| TNFRSF14 | 0.76753386 | 0.635761001 | 0.926619006 | 0.005905366 |
| CD79A | 0.876819034 | 0.802026757 | 0.958585996 | 0.00385546 |
| NFS1 | 0.778063878 | 0.654265563 | 0.925286967 | 0.0045369 |
| BTN3A2 | 0.79909998 | 0.675495468 | 0.945322076 | 0.00890163 |
| CD52 | 0.859034743 | 0.776242678 | 0.950657198 | 0.003297135 |
| TAPBP | 0.816015671 | 0.667910839 | 0.996961774 | 0.046619379 |
| IRF9 | 0.76398186 | 0.61965468 | 0.941925079 | 0.011735092 |
| CD40 | 0.778917407 | 0.641747482 | 0.945406636 | 0.011471717 |
| PTPN6 | 0.80792156 | 0.657072201 | 0.993402623 | 0.043100221 |
| HLA-H | 0.833232559 | 0.740123048 | 0.938055501 | 0.002547411 |
| RASSF5 | 0.760106107 | 0.641932142 | 0.900034843 | 0.001464626 |
| TRAF3IP3 | 0.778557961 | 0.651738219 | 0.930055167 | 0.005792795 |
| P2RY13 | 0.775815228 | 0.613103023 | 0.981709835 | 0.034543312 |
| THEMIS | 0.679895945 | 0.514293068 | 0.898823114 | 0.006750334 |
| IGFLR1 | 0.80800525 | 0.66088791 | 0.987871732 | 0.037621044 |
| ZNF831 | 0.747132144 | 0.571651229 | 0.976480785 | 0.03282571 |
| PARVG | 0.808050242 | 0.664227395 | 0.98301455 | 0.033066519 |
| PLAC8 | 0.835978193 | 0.72105083 | 0.969223681 | 0.017585208 |
| LCP1 | 0.812300127 | 0.713122826 | 0.925270477 | 0.001753961 |
| TRIM69 | 0.636325228 | 0.478716669 | 0.845823474 | 0.001851292 |
| TLR8 | 0.835249563 | 0.697663974 | 0.999968263 | 0.049959617 |
| IL23A | 0.727688299 | 0.560380407 | 0.944947851 | 0.017089715 |
| CXCL11 | 0.842307772 | 0.751576652 | 0.943992048 | 0.003165951 |
| CD79B | 0.841919307 | 0.74000919 | 0.957863942 | 0.008950775 |
| DEF6 | 0.688674499 | 0.54123386 | 0.876280291 | 0.002410119 |
| TNFRSF17 | 0.858923358 | 0.759410533 | 0.9714763 | 0.01549602 |
| SPOCK2 | 0.834789829 | 0.739460071 | 0.942409315 | 0.00351491 |
| HLA-DPB1 | 0.842457808 | 0.721242413 | 0.984045233 | 0.030550282 |
| IGHG1 | 0.911837926 | 0.858585215 | 0.968393573 | 0.002646952 |
| GIMAP6 | 0.833482179 | 0.705265175 | 0.985008997 | 0.032582189 |
| SRGN | 0.855908187 | 0.758890246 | 0.965329082 | 0.011250213 |
| CLECL1 | 0.705965455 | 0.560294059 | 0.889510099 | 0.003147633 |
| PIK3CD | 0.795769389 | 0.64999929 | 0.974230172 | 0.026907431 |
| KLRB1 | 0.791043025 | 0.677702991 | 0.923338213 | 0.002969804 |
| NAPSB | 0.844419394 | 0.73958465 | 0.964114266 | 0.012408673 |
| TNFRSF4 | 0.802306827 | 0.646491511 | 0.995676253 | 0.045576457 |
| CD19 | 0.850620577 | 0.747224222 | 0.968324293 | 0.014415113 |
| ACSL5 | 0.837514276 | 0.715091546 | 0.980895616 | 0.027863582 |
| PTPN22 | 0.778305876 | 0.612391389 | 0.989171382 | 0.040464871 |
| MZB1 | 0.893043964 | 0.817034764 | 0.976124341 | 0.012688016 |
| ALOX5 | 0.834113909 | 0.712620334 | 0.976320742 | 0.023925222 |
| CCR2 | 0.774473999 | 0.623663155 | 0.961753105 | 0.020728884 |
| IGKC | 0.88120372 | 0.811261619 | 0.957175809 | 0.002724018 |
| TAPBPL | 0.651971258 | 0.518286872 | 0.820137542 | 0.000258648 |
| SEL1L3 | 0.84037614 | 0.71744197 | 0.984375164 | 0.0311522 |
| PRDM1 | 0.817582788 | 0.674164046 | 0.991511812 | 0.040698745 |
| VCAM1 | 0.846407804 | 0.748889504 | 0.956624665 | 0.007585572 |
| IL15 | 0.789442395 | 0.62845244 | 0.991672966 | 0.042171408 |
| KLRD1 | 0.6380905 | 0.484437866 | 0.840478243 | 0.001391823 |
| CTSC | 0.825575808 | 0.710131369 | 0.959787788 | 0.012631135 |
| WIPF1 | 0.787109834 | 0.651288649 | 0.951255472 | 0.013247186 |
| B2M | 0.822561987 | 0.709391966 | 0.953786137 | 0.009695587 |
| PLCB2 | 0.774263722 | 0.618789665 | 0.968801429 | 0.025278926 |
| SKAP1 | 0.850040808 | 0.729652921 | 0.990291896 | 0.037054103 |
| IFI16 | 0.76966276 | 0.654167708 | 0.905548772 | 0.001599684 |
| PAG1 | 0.68644641 | 0.549208352 | 0.857977982 | 0.000946572 |
| IGLL1 | 0.84866951 | 0.755778342 | 0.952977741 | 0.005532069 |
| PVRIG | 0.787699318 | 0.645026007 | 0.961930539 | 0.019249878 |
| GIMAP2 | 0.803048766 | 0.64703924 | 0.996674206 | 0.046569896 |
| CSF2RA | 0.810523945 | 0.674247769 | 0.974343699 | 0.025306208 |
| REC8 | 0.777192162 | 0.625592286 | 0.965529259 | 0.022797216 |
| TMEM176B | 0.695342797 | 0.573530216 | 0.843027258 | 0.000217573 |
| RAB8B | 0.771726244 | 0.623131069 | 0.955756222 | 0.017564947 |
| CD274 | 0.724188023 | 0.553246577 | 0.947946747 | 0.018818872 |
| FGD3 | 0.732620753 | 0.608320677 | 0.882319454 | 0.001038851 |
| FAM30A | 0.759374858 | 0.600644362 | 0.960052589 | 0.021408057 |
| PPP1R16B | 0.794413037 | 0.676703071 | 0.932598211 | 0.004911432 |
| NMI | 0.806385451 | 0.659456053 | 0.986051297 | 0.036008056 |
| STAMBPL1 | 0.679834711 | 0.547896622 | 0.843544595 | 0.000455722 |
| LRMP | 0.829837991 | 0.691888406 | 0.995292138 | 0.044342665 |
| IL18R1 | 0.633562674 | 0.492244454 | 0.815451874 | 0.000393671 |
| GPR18 | 0.802836573 | 0.652088367 | 0.988434383 | 0.038490189 |
| PLCL2 | 0.721513233 | 0.594972825 | 0.874966592 | 0.000908082 |
| LYSMD2 | 0.746713312 | 0.614727879 | 0.907036738 | 0.003248534 |
| PLCG2 | 0.835597836 | 0.716123025 | 0.975005298 | 0.022518956 |
| MICA | 0.791074101 | 0.644375734 | 0.971169769 | 0.025123012 |
| CCL19 | 0.922260916 | 0.855984328 | 0.993669124 | 0.033430293 |
| LGALS2 | 0.743259459 | 0.595175976 | 0.928187035 | 0.008861876 |
| CXCR5 | 0.811547156 | 0.659873859 | 0.998082856 | 0.047912569 |
| RCSD1 | 0.768285658 | 0.61589446 | 0.958383117 | 0.019449508 |
| RFTN1 | 0.770885634 | 0.641816268 | 0.925910872 | 0.00538033 |
| FCRL5 | 0.777896753 | 0.609378018 | 0.993018028 | 0.043778165 |
| LGALS3BP | 0.838182975 | 0.73847937 | 0.951347767 | 0.006297948 |
| BIRC3 | 0.823033845 | 0.687038796 | 0.985948265 | 0.034554864 |
| SNX10 | 0.788161555 | 0.660080014 | 0.941095963 | 0.008515261 |
| CLEC4A | 0.796832566 | 0.647490479 | 0.980620037 | 0.031970397 |
| EFHD2 | 0.743521135 | 0.594019116 | 0.930649643 | 0.009668213 |
| ANKRD22 | 0.83069572 | 0.711096363 | 0.970410503 | 0.019353287 |
| C1S | 0.836162691 | 0.734207649 | 0.952275621 | 0.00699576 |
| RUNX3 | 0.794691182 | 0.690572926 | 0.914507433 | 0.001340023 |
| TMEM176A | 0.721313182 | 0.610431449 | 0.852336011 | 0.00012497 |
| SUSD3 | 0.800973566 | 0.681356281 | 0.941590578 | 0.007160841 |
| CELF2 | 0.761358076 | 0.614908101 | 0.942687403 | 0.012368596 |
| STK17B | 0.778375779 | 0.626973433 | 0.966338957 | 0.023194132 |
| PTGER4 | 0.740359491 | 0.608102898 | 0.901380634 | 0.002753061 |
| MAL | 0.863541032 | 0.749885133 | 0.994423122 | 0.041586426 |
| IL2RA | 0.783320714 | 0.638061214 | 0.961649647 | 0.01961442 |
| CCND2 | 0.743063824 | 0.631381972 | 0.874500494 | 0.000351929 |
| GLRX | 0.798263487 | 0.65996802 | 0.965538594 | 0.020273164 |
| HSD11B1 | 0.793451203 | 0.649652927 | 0.969078695 | 0.023338828 |
| RASGRP1 | 0.732602849 | 0.59651979 | 0.899730309 | 0.002999933 |
| BANK1 | 0.806807707 | 0.681213426 | 0.955557615 | 0.012899502 |
| PTGDS | 0.871291745 | 0.788453763 | 0.962833002 | 0.006871135 |
| TOX2 | 0.819974213 | 0.689930538 | 0.97452957 | 0.02427162 |
| MARCO | 0.900863053 | 0.814691584 | 0.996149042 | 0.041832946 |
| CCL13 | 0.863806878 | 0.760913238 | 0.980614195 | 0.023667508 |
| ETS1 | 0.827678754 | 0.706362221 | 0.9698312 | 0.019347189 |
| CD83 | 0.737648004 | 0.609626288 | 0.892554321 | 0.001755821 |
| BCL11B | 0.775193972 | 0.654317653 | 0.918400555 | 0.003238688 |
| TNF | 0.839378362 | 0.714700879 | 0.985805468 | 0.032824682 |
| PRKCQ-AS1 | 0.828216022 | 0.70504182 | 0.97290935 | 0.021774905 |
| RASSF2 | 0.771163734 | 0.650045512 | 0.914849027 | 0.002874358 |
| ITM2A | 0.847534303 | 0.752297189 | 0.954827967 | 0.006527965 |
| TUBB2A | 1.167679675 | 1.001774774 | 1.36106025 | 0.047407354 |
| NFE2L3 | 0.826064853 | 0.719852069 | 0.947949129 | 0.006504293 |
| HLA-A | 0.907412868 | 0.846909591 | 0.972238503 | 0.005786365 |
| NDUFA4L2 | 1.113153408 | 1.004759429 | 1.233240987 | 0.040286291 |
| TMPRSS3 | 0.871414916 | 0.768387586 | 0.988256408 | 0.032034736 |
| FBP1 | 0.886667474 | 0.789416142 | 0.995899586 | 0.042429516 |
| GPRC5C | 1.211603826 | 1.081258813 | 1.357661841 | 0.000948773 |
| MMP7 | 0.927306218 | 0.873633158 | 0.984276769 | 0.013103947 |
| AZGP1 | 1.095925096 | 1.018233357 | 1.179544755 | 0.01462219 |
| REEP6 | 1.11355715 | 1.027825421 | 1.206439831 | 0.008503297 |
| TFAP2B | 1.081932647 | 1.001571441 | 1.168741643 | 0.045517584 |
| SPDEF | 1.095665501 | 1.022909439 | 1.173596455 | 0.009158587 |
| SPINK8 | 1.10264145 | 1.023208864 | 1.188240457 | 0.010424185 |
| GABRP | 0.934842525 | 0.887035427 | 0.985226204 | 0.011879761 |
| FOXA1 | 1.070564683 | 1.002607458 | 1.143128082 | 0.041571133 |
| TFF3 | 1.06715226 | 1.006335079 | 1.131644885 | 0.02993881 |

HR:Hazard ratios; HR.95L: 95% lower confidence intervals; HR.95H: 95% higher confidence intervals;
